# Supplementary material for: Racial Disparities in Diagnosis of Attention-Deficit/Hyperactivity Disorder in a US National Birth Cohort
Source: PubMed Central journal article supplement (PMC7921900; doi:10.1001/jamanetworkopen.2021.0321), 2021-03-01

## Supplemental Online Content

Shi Y, Hunter Guevara LR, Dykhoff HJ, et al. Racial disparities in diagnosis of attention-deficit/hyperactivity disorder in a US national birth cohort. *JAMA Netw Open*. 2021;4(3):e210321. doi:10.1001/jamanetworkopen.2021.0321

**eTable 1.** Incidence of ADHD Diagnosis Based on Patient Characteristics

**eTable 2.** Odds Ratios of Receiving ADHD Treatment by Race/Ethnicity, Adjusting for Sex, Census Region, and Annual Household Income

**eFigure.** Cumulative Risk of ADHD Diagnosis by Gender

This supplemental material has been provided by the authors to give readers additional information about their work.

**eTable 1.** Incidence of ADHD diagnosis based on patient characteristics

|                  | <b>Total number of patients in group</b> | <b>Number of ADHD cases</b> | <b>Number of person-years (sum of follow-up time in years)</b> | <b>Incidence rate per 1000 person-years</b> |
|------------------|------------------------------------------|-----------------------------|----------------------------------------------------------------|---------------------------------------------|
| Sex              |                                          |                             |                                                                |                                             |
| Female           | 116,093                                  | 3,209                       | 811,753.8                                                      | 3.953                                       |
| Male             | 121,918                                  | 8,192                       | 840,436.6                                                      | 9.747                                       |
| Race/ethnicity   |                                          |                             |                                                                |                                             |
| Asian            | 15,831                                   | 365                         | 108,690.6                                                      | 3.358                                       |
| Black            | 14,792                                   | 682                         | 101,085.8                                                      | 6.747                                       |
| Hispanic         | 23,358                                   | 1,034                       | 163,577.7                                                      | 6.321                                       |
| Other/unknown    | 10,948                                   | 340                         | 71,094.0                                                       | 4.782                                       |
| White            | 173,082                                  | 8,980                       | 1,207,742.3                                                    | 7.435                                       |
| Census region    |                                          |                             |                                                                |                                             |
| Midwest          | 63,780                                   | 2,800                       | 445,453.6                                                      | 6.286                                       |
| Northeast        | 27,428                                   | 1,340                       | 188,347.2                                                      | 7.115                                       |
| South            | 103,721                                  | 5,771                       | 714,985.0                                                      | 8.071                                       |
| West             | 43,082                                   | 1,490                       | 303,404.6                                                      | 4.911                                       |
| Household income |                                          |                             |                                                                |                                             |
| <\$40K           | 11,790                                   | 724                         | 82,850.9                                                       | 8.739                                       |
| \$40K-\$74,999   | 34,182                                   | 1,865                       | 236,713.2                                                      | 7.879                                       |
| \$75K-\$124,999  | 56,350                                   | 3,118                       | 402,531.5                                                      | 7.746                                       |
| \$125K-\$199,999 | 46,027                                   | 2,498                       | 343,738.8                                                      | 7.267                                       |
| \$200K+          | 40,287                                   | 2,184                       | 318,434.3                                                      | 6.859                                       |
| Other/unknown    | 49,375                                   | 1,012                       | 267,921.7                                                      | 3.777                                       |

**eTable 2.** Odds ratio (OR) of receiving ADHD treatment by race/ethnicity, adjusting for sex, census region, and annual household income

|                         | OR (95% CI)       |
|-------------------------|-------------------|
| <b>Race</b>             |                   |
| White                   | Ref               |
| Asian                   | 0.54 (0.42, 0.70) |
| Black                   | 0.79 (0.64, 0.98) |
| Hispanic                | 0.57 (0.48, 0.67) |
| Other/Unknown           | 0.69 (0.52, 0.91) |
| <b>Sex</b>              |                   |
| Female                  | 0.91 (0.82, 1.02) |
| <b>Census Region</b>    |                   |
| Northeast               | Ref               |
| Midwest                 | 2.95 (2.48, 3.51) |
| South                   | 2.12 (1.82, 2.45) |
| West                    | 1.63 (1.35, 1.96) |
| <b>Household Income</b> |                   |
| >\$ 200K                | Ref               |
| \$125K-\$199,999        | 0.93 (0.79, 1.09) |
| \$75K-\$124,999         | 0.88 (0.75, 1.02) |
| \$40K-\$74,999          | 0.75 (0.63, 0.89) |
| <\$40K                  | 0.90 (0.71, 1.14) |
| Other/Unknown           | 0.56 (0.45, 0.70) |

eFigure

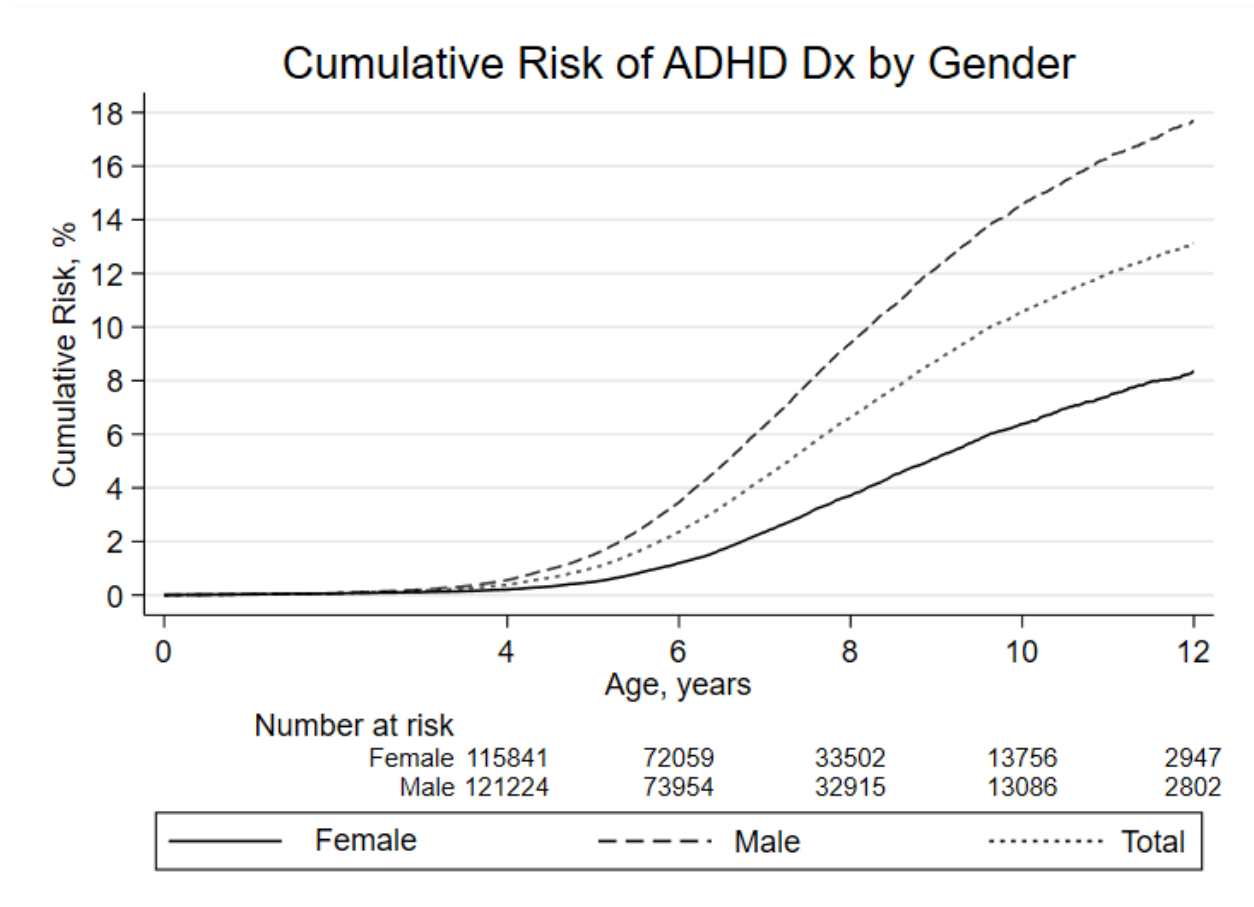

Supplement: jamanetwopen-e210321-s001.pdf [file jamanetwopen-e210321-s001.pdf]
